# Supplementary material for: Long-term exposure to ambient NO2 and adult mortality: A nationwide cohort study in China
Source: PubMed Central journal article supplement — J Adv Res. 2022 Feb 18;41:13–22. doi: 10.1016/j.jare.2022.02.007 (PMC9637729; doi:10.1016/j.jare.2022.02.007), 2022-02-18
Supplement: mmc1.pdf [file mmc1.pdf]

## Supplementary Material

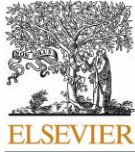

Contents lists available at [ScienceDirect](#)

Journal of Advanced Research

journal homepage: [www.elsevier.com](http://www.elsevier.com)

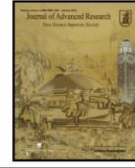

Original Article

### Long-term exposure to ambient NO<sub>2</sub> and adult mortality: A nationwide cohort study in China

Yunquan Zhang<sup>a,b,\*</sup>, Zunyan Li<sup>a</sup>, Jing Wei<sup>c</sup>, Yu Zhan<sup>d</sup>, Linjiong Liu<sup>a</sup>, Zhiming Yang<sup>e</sup>, Yuanyuan Zhang<sup>a</sup>, Riyang Liu<sup>f</sup>, Zongwei Ma<sup>f</sup>

- <sup>a</sup> Department of Epidemiology and Biostatistics, School of Public Health, Wuhan University of Science and Technology, Wuhan, Hubei, China
- <sup>b</sup> Hubei Province Key Laboratory of Occupational Hazard Identification and Control, Wuhan University of Science and Technology, Wuhan, Hubei, China
- <sup>c</sup> Department of Chemical and Biochemical Engineering, Iowa Technology Institute, The University of Iowa, Iowa City, IA 52242, USA
- <sup>d</sup> Department of Environmental Science and Engineering, Sichuan University, Chengdu, Sichuan, China
- <sup>e</sup> School of Economics and Management, University of Science and Technology Beijing, Beijing, China
- <sup>f</sup> State Key Laboratory of Pollution Control and Resource Reuse, School of the Environment, Nanjing University, Nanjing, Jiangsu, China

---

\* Corresponding author: Y. Zhang, Department of Epidemiology and Biostatistics, School of Public Health, Wuhan University of Science and Technology, Wuhan 430065, China  
E-mail: [YunquanZhang@wust.edu.cn](mailto:YunquanZhang@wust.edu.cn)

## Table of contents

### ***Section 1 Supplementary Methods & Data Source***

**1.1** Supplementary descriptions for the CFPS interview and participants

**1.2** Supplementary methods for the calculation of attributable deaths

**Table Appendix 1** Provincial population estimates aggregated from WorldPop's gridded datasets at a 1×1-km resolution

**Table Appendix 2** Provincial estimates of crude death rates derived from China Statistical Yearbook

### ***Section 2 Supplementary Tables & Figures***

**Table S1** AIC and BIC values of Cox models using 3–6 knots in RCS smoothing for annual average exposure to ambient NO<sub>2</sub>

**Table S2** Look-up table for concentration-response function of longitudinal association between annual exposure to ambient NO<sub>2</sub> and all-cause mortality in Chinese adults

**Table S3** Sensitive analyses of HR [95% CI] estimates for all-cause mortality associated with a-10 µg/m<sup>3</sup> increase in exposure to ambient NO<sub>2</sub>

**Table S4** Provincial estimates of all-cause deaths attributable to ambient NO<sub>2</sub> in China for years 2010 and 2018

**Fig. S1** Directed acyclic graph for the longitudinal association between ambient NO<sub>2</sub> exposure and adult mortality, created using the online DAGitty tool ([www.dagitty.net](http://www.dagitty.net))

**Fig. S2** Percentage change (%) of average NO<sub>2</sub> concentration between 2010 and 2018

**Fig. S3** County-specific estimates of all-cause deaths attributable to ambient NO<sub>2</sub> across China in 2010

**Fig. S4** Regional changes in estimates of NO<sub>2</sub>-attributable deaths in China between 2010 and 2018

## **Section 1 Supplementary Methods & Data Source**

### **1.1 Supplementary descriptions for the CFPS interview and participants**

#### **I. Reliability and validity of CFPS interview**

In CFPS surveys, face-to-face interviews were performed by well-trained investigators, aided by computer-assisted personal interviewing technology. For those participants who were unable to respond themselves, a family member was asked to take his/her place to reply to the questionnaire items. During all stages of data collection, the CFPS research team adopted telephone check, field check, audio record check, interview reviews and statistical analyses to ensure data quality.

Besides, to assure the reliability and validity of the interview, the pilot investigations (baseline in 2008, and follow-up in 2009) had been conducted in three provincial regions (i.e., Beijing, Shanghai, and Guangdong) before the nationwide CFPS baseline survey in 2010. See details in prior publications for the CFPS survey.

#### **II. Inclusion of CFPS participants**

China Family Panel Studies is a nationally representative, annual longitudinal survey administered by the Institute of Social Science Survey (ISSS) of Peking University. CFPS baseline survey in 2010 totally includes 33,600 Chinese adult respondents residing in 162 counties or districts from 25 (of 30) provincial regions in China, wherein 94.5% of national population resided. All the sub-sampling frames of CFPS were based on a stratified three stage probability random sampling procedure: 1) the primary sampling unit: administrative districts/counties; 2) the second-stage sampling unit: administrative villages/communities; 3) the third-stage sampling unit: households. Family members aged 16 and above in each household in 2010 are selected as the CFPS baseline respondents and permanently included as follow-up subjects in subsequent waves of CFPS investigations. Finally, CFPS 2010 included a total of 33,600 participants enrolled from 14,608 households in 649 villages/communities.

### **1.2 Supplementary methods for the calculation of attributable deaths**

Calculation formula of attributable death (AD):

$$AD_i = TD_i \times PAF_i = (Pop_i \times Mort_i) \times \left( \frac{HR_{C_i} - 1}{HR_{C_i}} \right)$$

Where  $Pop_i$  refers to population size in county  $i$ ,  $Mort_i$  represents corresponding crude mortality rate,  $C_i$  denotes county-specific concentration of annual average  $NO_2$ , and  $HR_{C_i}$  indicates hazard ratio of all-cause mortality at concentration  $C_i$ .

County-specific population sizes in China for years 2010 and 2018 were aggregated from gridded population estimates at a 1×1-km resolution released by WorldPop ([www.worldpop.org](http://www.worldpop.org), accessed on November 30th, 2021). Given that we have only access to year-specific death rates by province from China Statistical Yearbook (<http://www.stats.gov.cn/tjsj/ndsj/>, accessed on November 30th, 2021) owing to data

availability, we thus assumed that crude mortality rates did not vary across counties in a provincial region. **Table A1** summarized provincial population estimates in China for years 2010 and 2018, aggregated from WorldPop's gridded datasets at a 1×1-km resolution. **Table A2** tabulated provincial estimates of crude death rates in China for years 2010 and 2018, derived from China Statistical Yearbook.

### References

1. Xie, Y., Hu, J. W., An Introduction to the China Family Panel Studies (CFPS). *Chin Sociol Rev* 2014, 47, 3-29.
2. Xie, Y., Lu, P., The Sampling Design of the China Family Panel Studies (CFPS). *Chin J Sociol* 2015, 1, 471-484.
3. Yue, H.; He, C.; Huang, Q.; Yin, D.; Bryan, B. A., Stronger policy required to substantially reduce deaths from PM<sub>2.5</sub> pollution in China. *Nat Commun* 2020, 11, (1), 1462.
4. Li, T.; Zhang, Y.; Wang, J.; Xu, D.; Yin, Z.; Chen, H.; Lv, Y.; Luo, J.; Zeng, Y.; Liu, Y.; Kinney, P. L.; Shi, X., All-cause mortality risk associated with long-term exposure to ambient PM<sub>2.5</sub> in China: a cohort study. *Lancet Public Health* 2018, 3, (10), e470-e477.
5. Zhang, Y., All-Cause Mortality Risk and Attributable Deaths Associated with Long-Term Exposure to Ambient PM<sub>2.5</sub> in Chinese Adults. *Environ Sci Technol* 2021, 55, (9), 6116-6127.

**Table A1** Provincial population estimates in China for years 2010 and 2018, aggregated from WorldPop's gridded datasets at a 1×1-km resolution

| Region       | Aggregated population ( $\times 10^4$ ) |       |
|--------------|-----------------------------------------|-------|
|              | 2010                                    | 2018  |
| Beijing      | 2016                                    | 2648  |
| Tianjin      | 1325                                    | 1611  |
| Hebei        | 7375                                    | 7668  |
| Shanxi       | 3674                                    | 3888  |
| Mongolia     | 2562                                    | 2652  |
| Liaoning     | 4486                                    | 4565  |
| Jilin        | 2814                                    | 2811  |
| Heilongjiang | 3913                                    | 4018  |
| Shanghai     | 2361                                    | 3031  |
| Jiangsu      | 8075                                    | 8328  |
| Zhejiang     | 5571                                    | 6250  |
| Anhui        | 6107                                    | 6006  |
| Fujian       | 3758                                    | 3989  |
| Jiangxi      | 4580                                    | 4871  |
| Shandong     | 9836                                    | 10135 |
| Henan        | 9675                                    | 9761  |
| Hubei        | 5880                                    | 5622  |
| Hunan        | 6749                                    | 6819  |
| Guangdong    | 10663                                   | 12197 |
| Guangxi      | 4719                                    | 4807  |
| Hainan       | 880                                     | 967   |
| Chongqing    | 2964                                    | 2773  |
| Sichuan      | 8264                                    | 8057  |
| Guizhou      | 3572                                    | 3474  |
| Yunnan       | 4710                                    | 4925  |
| Tibet        | 308                                     | 338   |
| Shaanxi      | 3829                                    | 3906  |
| Gansu        | 2627                                    | 2613  |
| Qinghai      | 578                                     | 647   |
| Ningxia      | 648                                     | 722   |
| Xinjiang     | 2242                                    | 2525  |

**Table A2** Provincial estimates of crude death rates in China for years 2010 and 2018, derived from China Statistical Yearbook

| Region       | Crude death rate (‰) |      |
|--------------|----------------------|------|
|              | 2010                 | 2018 |
| National     | 7.11                 | 7.13 |
| Beijing      | 4.41                 | 5.58 |
| Tianjin      | 5.58                 | 5.42 |
| Hebei        | 6.41                 | 6.36 |
| Shanxi       | 5.38                 | 5.32 |
| Mongolia     | 5.54                 | 5.95 |
| Liaoning     | 6.26                 | 7.39 |
| Jilin        | 5.88                 | 6.26 |
| Heilongjiang | 5.03                 | 6.67 |
| Shanghai     | 5.07                 | 5.40 |
| Jiangsu      | 6.88                 | 7.03 |
| Zhejiang     | 5.54                 | 5.58 |
| Anhui        | 5.95                 | 5.96 |
| Fujian       | 5.16                 | 6.20 |
| Jiangxi      | 6.06                 | 6.06 |
| Shandong     | 6.26                 | 7.18 |
| Henan        | 6.57                 | 6.80 |
| Hubei        | 6.02                 | 7.00 |
| Hunan        | 6.70                 | 7.08 |
| Guangdong    | 4.21                 | 4.55 |
| Guangxi      | 5.48                 | 5.96 |
| Hainan       | 5.73                 | 6.01 |
| Chongqing    | 6.40                 | 7.54 |
| Sichuan      | 6.62                 | 7.01 |
| Guizhou      | 6.55                 | 6.85 |
| Yunnan       | 6.56                 | 6.32 |
| Tibet        | 5.55                 | 4.58 |
| Shaanxi      | 6.01                 | 6.24 |
| Gansu        | 6.02                 | 6.65 |
| Qinghai      | 6.31                 | 6.25 |
| Ningxia      | 5.10                 | 5.54 |
| Xinjiang     | 5.43                 | 4.56 |

## Section 2 Supplementary Tables & Figures

**Table S1** AIC and BIC values of Cox models using 3–6 knots in RCS smoothing for annual average exposure to ambient NO<sub>2</sub>

**Table S2** Look-up table for concentration-response function of longitudinal association between annual exposure to ambient NO<sub>2</sub> and all-cause mortality in Chinese adults

**Table S3** Sensitive analyses of HR [95% CI] estimates for all-cause mortality associated with a-10 µg/m<sup>3</sup> increase in exposure to ambient NO<sub>2</sub>

**Table S4** Provincial estimates of all-cause deaths attributable to ambient NO<sub>2</sub> in China for years 2010 and 2018

**Fig. S1** Directed acyclic graph for the longitudinal association between ambient NO<sub>2</sub> exposure and adult mortality, created using the online DAGitty tool ([www.dagitty.net](http://www.dagitty.net))

**Fig. S2** Percentage change (%) of average NO<sub>2</sub> concentration between 2010 and 2018

**Fig. S3** County-specific estimates of all-cause deaths attributable to ambient NO<sub>2</sub> across China in 2010

**Fig. S4** Regional changes in estimates of NO<sub>2</sub>-attributable deaths in China between 2010 and 2018

**Table S1** AIC and BIC values of Cox models using 3–6 knots in RCS smoothing for annual average exposure to ambient NO<sub>2</sub>

| Number of knots | Model fit |          |
|-----------------|-----------|----------|
|                 | AIC       | BIC      |
| n=3             | 17416.79  | 17531.91 |
| n=4             | 17418.36  | 17538.71 |
| n=5             | 17419.35  | 17544.93 |
| n=6             | 17416.14  | 17546.96 |

Abbreviations: NO<sub>2</sub>, nitrogen dioxide; AIC, Akaike information criterion; BIC, Bayesian information criterion; RCS, restricted cubic spline.



**Table S2** Look-up table for exposure-response function of longitudinal association between annual exposure to ambient NO<sub>2</sub> and all-cause mortality in Chinese adults

| NO <sub>2</sub> concentration | HR    | 95% LCL | 95% UCL | NO <sub>2</sub> concentration | HR    | 95% LCL | 95% UCL |
|-------------------------------|-------|---------|---------|-------------------------------|-------|---------|---------|
| 6.9                           | 1     | 1       | 1       | 32.5                          | 1.498 | 1.156   | 1.941   |
| 7.0                           | 1.002 | 1.000   | 1.004   | 32.6                          | 1.499 | 1.157   | 1.942   |
| 7.1                           | 1.005 | 1.001   | 1.009   | 32.7                          | 1.499 | 1.157   | 1.942   |
| 7.2                           | 1.007 | 1.001   | 1.013   | 32.8                          | 1.500 | 1.158   | 1.943   |
| 7.3                           | 1.009 | 1.001   | 1.017   | 32.9                          | 1.501 | 1.159   | 1.943   |
| 7.4                           | 1.011 | 1.001   | 1.022   | 33.0                          | 1.501 | 1.159   | 1.944   |
| 7.5                           | 1.014 | 1.002   | 1.026   | 33.1                          | 1.502 | 1.160   | 1.944   |
| 7.6                           | 1.016 | 1.002   | 1.030   | 33.2                          | 1.503 | 1.161   | 1.945   |
| 7.7                           | 1.018 | 1.002   | 1.035   | 33.3                          | 1.503 | 1.162   | 1.945   |
| 7.8                           | 1.021 | 1.002   | 1.039   | 33.4                          | 1.504 | 1.162   | 1.946   |
| 7.9                           | 1.023 | 1.003   | 1.044   | 33.5                          | 1.505 | 1.163   | 1.946   |
| 8.0                           | 1.025 | 1.003   | 1.048   | 33.6                          | 1.505 | 1.164   | 1.947   |
| 8.1                           | 1.028 | 1.003   | 1.053   | 33.7                          | 1.506 | 1.164   | 1.948   |
| 8.2                           | 1.030 | 1.004   | 1.057   | 33.8                          | 1.506 | 1.165   | 1.948   |
| 8.3                           | 1.032 | 1.004   | 1.062   | 33.9                          | 1.507 | 1.166   | 1.949   |
| 8.4                           | 1.035 | 1.004   | 1.066   | 34.0                          | 1.508 | 1.166   | 1.950   |
| 8.5                           | 1.037 | 1.004   | 1.071   | 34.1                          | 1.508 | 1.167   | 1.950   |
| 8.6                           | 1.040 | 1.005   | 1.076   | 34.2                          | 1.509 | 1.167   | 1.951   |
| 8.7                           | 1.042 | 1.005   | 1.080   | 34.3                          | 1.510 | 1.168   | 1.952   |
| 8.8                           | 1.044 | 1.005   | 1.085   | 34.4                          | 1.510 | 1.168   | 1.952   |
| 8.9                           | 1.047 | 1.005   | 1.090   | 34.5                          | 1.511 | 1.169   | 1.953   |
| 9.0                           | 1.049 | 1.006   | 1.094   | 34.6                          | 1.512 | 1.170   | 1.954   |
| 9.1                           | 1.051 | 1.006   | 1.099   | 34.7                          | 1.512 | 1.170   | 1.955   |
| 9.2                           | 1.054 | 1.006   | 1.104   | 34.8                          | 1.513 | 1.171   | 1.956   |
| 9.3                           | 1.056 | 1.007   | 1.108   | 34.9                          | 1.514 | 1.171   | 1.957   |
| 9.4                           | 1.059 | 1.007   | 1.113   | 35.0                          | 1.514 | 1.172   | 1.957   |
| 9.5                           | 1.061 | 1.007   | 1.118   | 35.1                          | 1.515 | 1.172   | 1.958   |
| 9.6                           | 1.064 | 1.007   | 1.123   | 35.2                          | 1.516 | 1.173   | 1.959   |
| 9.7                           | 1.066 | 1.008   | 1.128   | 35.3                          | 1.516 | 1.173   | 1.960   |
| 9.8                           | 1.068 | 1.008   | 1.132   | 35.4                          | 1.517 | 1.174   | 1.961   |
| 9.9                           | 1.071 | 1.008   | 1.137   | 35.5                          | 1.518 | 1.174   | 1.962   |
| 10.0                          | 1.073 | 1.008   | 1.142   | 35.6                          | 1.518 | 1.175   | 1.963   |
| 10.1                          | 1.076 | 1.009   | 1.147   | 35.7                          | 1.519 | 1.175   | 1.964   |
| 10.2                          | 1.078 | 1.009   | 1.152   | 35.8                          | 1.520 | 1.175   | 1.965   |
| 10.3                          | 1.081 | 1.009   | 1.157   | 35.9                          | 1.520 | 1.176   | 1.966   |
| 10.4                          | 1.083 | 1.010   | 1.162   | 36.0                          | 1.521 | 1.176   | 1.967   |
| 10.5                          | 1.086 | 1.010   | 1.167   | 36.1                          | 1.522 | 1.177   | 1.968   |
| 10.6                          | 1.088 | 1.010   | 1.172   | 36.2                          | 1.522 | 1.177   | 1.969   |

---

|      |       |       |       |      |       |       |       |
|------|-------|-------|-------|------|-------|-------|-------|
| 10.7 | 1.091 | 1.010 | 1.177 | 36.3 | 1.523 | 1.177 | 1.970 |
| 10.8 | 1.093 | 1.011 | 1.182 | 36.4 | 1.524 | 1.178 | 1.971 |
| 10.9 | 1.096 | 1.011 | 1.187 | 36.5 | 1.524 | 1.178 | 1.972 |
| 11.0 | 1.098 | 1.011 | 1.192 | 36.6 | 1.525 | 1.178 | 1.974 |
| 11.1 | 1.101 | 1.011 | 1.197 | 36.7 | 1.526 | 1.179 | 1.975 |
| 11.2 | 1.103 | 1.012 | 1.203 | 36.8 | 1.526 | 1.179 | 1.976 |
| 11.3 | 1.106 | 1.012 | 1.208 | 36.9 | 1.527 | 1.179 | 1.977 |
| 11.4 | 1.108 | 1.012 | 1.213 | 37.0 | 1.528 | 1.180 | 1.978 |
| 11.5 | 1.111 | 1.013 | 1.218 | 37.1 | 1.528 | 1.180 | 1.980 |
| 11.6 | 1.113 | 1.013 | 1.223 | 37.2 | 1.529 | 1.180 | 1.981 |
| 11.7 | 1.116 | 1.013 | 1.229 | 37.3 | 1.530 | 1.180 | 1.982 |
| 11.8 | 1.118 | 1.013 | 1.234 | 37.4 | 1.530 | 1.181 | 1.984 |
| 11.9 | 1.121 | 1.014 | 1.239 | 37.5 | 1.531 | 1.181 | 1.985 |
| 12.0 | 1.123 | 1.014 | 1.245 | 37.6 | 1.532 | 1.181 | 1.986 |
| 12.1 | 1.126 | 1.014 | 1.250 | 37.7 | 1.532 | 1.181 | 1.988 |
| 12.2 | 1.128 | 1.014 | 1.255 | 37.8 | 1.533 | 1.182 | 1.989 |
| 12.3 | 1.131 | 1.015 | 1.261 | 37.9 | 1.534 | 1.182 | 1.990 |
| 12.4 | 1.134 | 1.015 | 1.266 | 38.0 | 1.534 | 1.182 | 1.992 |
| 12.5 | 1.136 | 1.015 | 1.272 | 38.1 | 1.535 | 1.182 | 1.993 |
| 12.6 | 1.139 | 1.016 | 1.277 | 38.2 | 1.536 | 1.182 | 1.995 |
| 12.7 | 1.141 | 1.016 | 1.283 | 38.3 | 1.536 | 1.182 | 1.996 |
| 12.8 | 1.144 | 1.016 | 1.288 | 38.4 | 1.537 | 1.183 | 1.998 |
| 12.9 | 1.147 | 1.016 | 1.294 | 38.5 | 1.538 | 1.183 | 1.999 |
| 13.0 | 1.149 | 1.017 | 1.299 | 38.6 | 1.538 | 1.183 | 2.001 |
| 13.1 | 1.152 | 1.017 | 1.305 | 38.7 | 1.539 | 1.183 | 2.002 |
| 13.2 | 1.155 | 1.017 | 1.310 | 38.8 | 1.540 | 1.183 | 2.004 |
| 13.3 | 1.157 | 1.017 | 1.316 | 38.9 | 1.540 | 1.183 | 2.006 |
| 13.4 | 1.160 | 1.018 | 1.322 | 39.0 | 1.541 | 1.183 | 2.007 |
| 13.5 | 1.162 | 1.018 | 1.327 | 39.1 | 1.542 | 1.183 | 2.009 |
| 13.6 | 1.165 | 1.018 | 1.333 | 39.2 | 1.542 | 1.183 | 2.010 |
| 13.7 | 1.168 | 1.019 | 1.339 | 39.3 | 1.543 | 1.183 | 2.012 |
| 13.8 | 1.170 | 1.019 | 1.344 | 39.4 | 1.544 | 1.183 | 2.014 |
| 13.9 | 1.173 | 1.019 | 1.350 | 39.5 | 1.544 | 1.183 | 2.016 |
| 14.0 | 1.176 | 1.019 | 1.356 | 39.6 | 1.545 | 1.183 | 2.017 |
| 14.1 | 1.178 | 1.020 | 1.362 | 39.7 | 1.546 | 1.183 | 2.019 |
| 14.2 | 1.181 | 1.020 | 1.368 | 39.8 | 1.546 | 1.183 | 2.021 |
| 14.3 | 1.184 | 1.020 | 1.374 | 39.9 | 1.547 | 1.183 | 2.023 |
| 14.4 | 1.186 | 1.021 | 1.379 | 40.0 | 1.548 | 1.183 | 2.024 |
| 14.5 | 1.189 | 1.021 | 1.385 | 40.1 | 1.548 | 1.183 | 2.026 |
| 14.6 | 1.192 | 1.021 | 1.391 | 40.2 | 1.549 | 1.183 | 2.028 |
| 14.7 | 1.195 | 1.021 | 1.397 | 40.3 | 1.550 | 1.183 | 2.030 |
| 14.8 | 1.197 | 1.022 | 1.403 | 40.4 | 1.551 | 1.183 | 2.032 |
| 14.9 | 1.200 | 1.022 | 1.409 | 40.5 | 1.551 | 1.183 | 2.034 |
| 15.0 | 1.203 | 1.022 | 1.415 | 40.6 | 1.552 | 1.183 | 2.035 |

---

|      |       |       |       |      |       |       |       |
|------|-------|-------|-------|------|-------|-------|-------|
| 15.1 | 1.205 | 1.023 | 1.421 | 40.7 | 1.553 | 1.183 | 2.037 |
| 15.2 | 1.208 | 1.023 | 1.427 | 40.8 | 1.553 | 1.183 | 2.039 |
| 15.3 | 1.211 | 1.023 | 1.433 | 40.9 | 1.554 | 1.183 | 2.041 |
| 15.4 | 1.214 | 1.023 | 1.439 | 41.0 | 1.555 | 1.183 | 2.043 |
| 15.5 | 1.216 | 1.024 | 1.445 | 41.1 | 1.555 | 1.183 | 2.045 |
| 15.6 | 1.219 | 1.024 | 1.451 | 41.2 | 1.556 | 1.182 | 2.047 |
| 15.7 | 1.222 | 1.024 | 1.457 | 41.3 | 1.557 | 1.182 | 2.049 |
| 15.8 | 1.224 | 1.025 | 1.463 | 41.4 | 1.557 | 1.182 | 2.051 |
| 15.9 | 1.227 | 1.025 | 1.469 | 41.5 | 1.558 | 1.182 | 2.053 |
| 16.0 | 1.230 | 1.025 | 1.475 | 41.6 | 1.559 | 1.182 | 2.056 |
| 16.1 | 1.233 | 1.026 | 1.481 | 41.7 | 1.559 | 1.182 | 2.058 |
| 16.2 | 1.235 | 1.026 | 1.487 | 41.8 | 1.560 | 1.182 | 2.060 |
| 16.3 | 1.238 | 1.026 | 1.493 | 41.9 | 1.561 | 1.181 | 2.062 |
| 16.4 | 1.241 | 1.027 | 1.499 | 42.0 | 1.561 | 1.181 | 2.064 |
| 16.5 | 1.243 | 1.027 | 1.505 | 42.1 | 1.562 | 1.181 | 2.066 |
| 16.6 | 1.246 | 1.027 | 1.511 | 42.2 | 1.563 | 1.181 | 2.068 |
| 16.7 | 1.249 | 1.028 | 1.517 | 42.3 | 1.563 | 1.180 | 2.071 |
| 16.8 | 1.251 | 1.028 | 1.523 | 42.4 | 1.564 | 1.180 | 2.073 |
| 16.9 | 1.254 | 1.028 | 1.529 | 42.5 | 1.565 | 1.180 | 2.075 |
| 17.0 | 1.257 | 1.029 | 1.535 | 42.6 | 1.565 | 1.180 | 2.077 |
| 17.1 | 1.259 | 1.029 | 1.541 | 42.7 | 1.566 | 1.179 | 2.080 |
| 17.2 | 1.262 | 1.030 | 1.547 | 42.8 | 1.567 | 1.179 | 2.082 |
| 17.3 | 1.265 | 1.030 | 1.553 | 42.9 | 1.568 | 1.179 | 2.084 |
| 17.4 | 1.267 | 1.030 | 1.559 | 43.0 | 1.568 | 1.179 | 2.086 |
| 17.5 | 1.270 | 1.031 | 1.565 | 43.1 | 1.569 | 1.178 | 2.089 |
| 17.6 | 1.273 | 1.031 | 1.571 | 43.2 | 1.570 | 1.178 | 2.091 |
| 17.7 | 1.275 | 1.031 | 1.577 | 43.3 | 1.570 | 1.178 | 2.094 |
| 17.8 | 1.278 | 1.032 | 1.583 | 43.4 | 1.571 | 1.177 | 2.096 |
| 17.9 | 1.281 | 1.032 | 1.589 | 43.5 | 1.572 | 1.177 | 2.098 |
| 18.0 | 1.283 | 1.033 | 1.595 | 43.6 | 1.572 | 1.177 | 2.101 |
| 18.1 | 1.286 | 1.033 | 1.601 | 43.7 | 1.573 | 1.176 | 2.103 |
| 18.2 | 1.289 | 1.034 | 1.606 | 43.8 | 1.574 | 1.176 | 2.106 |
| 18.3 | 1.291 | 1.034 | 1.612 | 43.9 | 1.574 | 1.176 | 2.108 |
| 18.4 | 1.294 | 1.034 | 1.618 | 44.0 | 1.575 | 1.175 | 2.111 |
| 18.5 | 1.296 | 1.035 | 1.624 | 44.1 | 1.576 | 1.175 | 2.113 |
| 18.6 | 1.299 | 1.035 | 1.629 | 44.2 | 1.576 | 1.175 | 2.116 |
| 18.7 | 1.301 | 1.036 | 1.635 | 44.3 | 1.577 | 1.174 | 2.118 |
| 18.8 | 1.304 | 1.036 | 1.641 | 44.4 | 1.578 | 1.174 | 2.121 |
| 18.9 | 1.307 | 1.037 | 1.646 | 44.5 | 1.578 | 1.173 | 2.123 |
| 19.0 | 1.309 | 1.037 | 1.652 | 44.6 | 1.579 | 1.173 | 2.126 |
| 19.1 | 1.312 | 1.038 | 1.658 | 44.7 | 1.580 | 1.173 | 2.129 |
| 19.2 | 1.314 | 1.038 | 1.663 | 44.8 | 1.581 | 1.172 | 2.131 |
| 19.3 | 1.317 | 1.039 | 1.669 | 44.9 | 1.581 | 1.172 | 2.134 |
| 19.4 | 1.319 | 1.039 | 1.674 | 45.0 | 1.582 | 1.171 | 2.136 |

---

|      |       |       |       |      |       |       |       |
|------|-------|-------|-------|------|-------|-------|-------|
| 19.5 | 1.322 | 1.040 | 1.680 | 45.1 | 1.583 | 1.171 | 2.139 |
| 19.6 | 1.324 | 1.040 | 1.685 | 45.2 | 1.583 | 1.170 | 2.142 |
| 19.7 | 1.326 | 1.041 | 1.690 | 45.3 | 1.584 | 1.170 | 2.145 |
| 19.8 | 1.329 | 1.041 | 1.696 | 45.4 | 1.585 | 1.170 | 2.147 |
| 19.9 | 1.331 | 1.042 | 1.701 | 45.5 | 1.585 | 1.169 | 2.150 |
| 20.0 | 1.334 | 1.043 | 1.706 | 45.6 | 1.586 | 1.169 | 2.153 |
| 20.1 | 1.336 | 1.043 | 1.711 | 45.7 | 1.587 | 1.168 | 2.155 |
| 20.2 | 1.338 | 1.044 | 1.716 | 45.8 | 1.587 | 1.168 | 2.158 |
| 20.3 | 1.341 | 1.044 | 1.721 | 45.9 | 1.588 | 1.167 | 2.161 |
| 20.4 | 1.343 | 1.045 | 1.726 | 46.0 | 1.589 | 1.167 | 2.164 |
| 20.5 | 1.345 | 1.046 | 1.731 | 46.1 | 1.590 | 1.166 | 2.167 |
| 20.6 | 1.348 | 1.046 | 1.736 | 46.2 | 1.590 | 1.166 | 2.169 |
| 20.7 | 1.350 | 1.047 | 1.741 | 46.3 | 1.591 | 1.165 | 2.172 |
| 20.8 | 1.352 | 1.047 | 1.746 | 46.4 | 1.592 | 1.165 | 2.175 |
| 20.9 | 1.355 | 1.048 | 1.751 | 46.5 | 1.592 | 1.164 | 2.178 |
| 21.0 | 1.357 | 1.049 | 1.755 | 46.6 | 1.593 | 1.164 | 2.181 |
| 21.1 | 1.359 | 1.049 | 1.760 | 46.7 | 1.594 | 1.163 | 2.184 |
| 21.2 | 1.361 | 1.050 | 1.764 | 46.8 | 1.594 | 1.162 | 2.187 |
| 21.3 | 1.363 | 1.051 | 1.769 | 46.9 | 1.595 | 1.162 | 2.190 |
| 21.4 | 1.365 | 1.051 | 1.773 | 47.0 | 1.596 | 1.161 | 2.193 |
| 21.5 | 1.368 | 1.052 | 1.778 | 47.1 | 1.596 | 1.161 | 2.196 |
| 21.6 | 1.370 | 1.053 | 1.782 | 47.2 | 1.597 | 1.160 | 2.199 |
| 21.7 | 1.372 | 1.054 | 1.786 | 47.3 | 1.598 | 1.160 | 2.202 |
| 21.8 | 1.374 | 1.054 | 1.790 | 47.4 | 1.599 | 1.159 | 2.205 |
| 21.9 | 1.376 | 1.055 | 1.794 | 47.5 | 1.599 | 1.159 | 2.208 |
| 22.0 | 1.378 | 1.056 | 1.798 | 47.6 | 1.600 | 1.158 | 2.211 |
| 22.1 | 1.380 | 1.057 | 1.802 | 47.7 | 1.601 | 1.157 | 2.214 |
| 22.2 | 1.382 | 1.057 | 1.806 | 47.8 | 1.601 | 1.157 | 2.217 |
| 22.3 | 1.384 | 1.058 | 1.810 | 47.9 | 1.602 | 1.156 | 2.220 |
| 22.4 | 1.386 | 1.059 | 1.813 | 48.0 | 1.603 | 1.156 | 2.223 |
| 22.5 | 1.388 | 1.060 | 1.817 | 48.1 | 1.603 | 1.155 | 2.226 |
| 22.6 | 1.390 | 1.061 | 1.820 | 48.2 | 1.604 | 1.154 | 2.229 |
| 22.7 | 1.391 | 1.061 | 1.824 | 48.3 | 1.605 | 1.154 | 2.233 |
| 22.8 | 1.393 | 1.062 | 1.827 | 48.4 | 1.606 | 1.153 | 2.236 |
| 22.9 | 1.395 | 1.063 | 1.831 | 48.5 | 1.606 | 1.152 | 2.239 |
| 23.0 | 1.397 | 1.064 | 1.834 | 48.6 | 1.607 | 1.152 | 2.242 |
| 23.1 | 1.399 | 1.065 | 1.837 | 48.7 | 1.608 | 1.151 | 2.245 |
| 23.2 | 1.400 | 1.066 | 1.840 | 48.8 | 1.608 | 1.150 | 2.248 |
| 23.3 | 1.402 | 1.067 | 1.843 | 48.9 | 1.609 | 1.150 | 2.252 |
| 23.4 | 1.404 | 1.068 | 1.846 | 49.0 | 1.610 | 1.149 | 2.255 |
| 23.5 | 1.406 | 1.068 | 1.849 | 49.1 | 1.610 | 1.149 | 2.258 |
| 23.6 | 1.407 | 1.069 | 1.852 | 49.2 | 1.611 | 1.148 | 2.262 |
| 23.7 | 1.409 | 1.070 | 1.855 | 49.3 | 1.612 | 1.147 | 2.265 |
| 23.8 | 1.411 | 1.071 | 1.857 | 49.4 | 1.613 | 1.147 | 2.268 |

---

|      |       |       |       |      |       |       |       |
|------|-------|-------|-------|------|-------|-------|-------|
| 23.9 | 1.412 | 1.072 | 1.860 | 49.5 | 1.613 | 1.146 | 2.271 |
| 24.0 | 1.414 | 1.073 | 1.863 | 49.6 | 1.614 | 1.145 | 2.275 |
| 24.1 | 1.415 | 1.074 | 1.865 | 49.7 | 1.615 | 1.144 | 2.278 |
| 24.2 | 1.417 | 1.075 | 1.868 | 49.8 | 1.615 | 1.144 | 2.281 |
| 24.3 | 1.418 | 1.076 | 1.870 | 49.9 | 1.616 | 1.143 | 2.285 |
| 24.4 | 1.420 | 1.077 | 1.872 | 50.0 | 1.617 | 1.142 | 2.288 |
| 24.5 | 1.421 | 1.078 | 1.875 | 50.1 | 1.618 | 1.142 | 2.292 |
| 24.6 | 1.423 | 1.079 | 1.877 | 50.2 | 1.618 | 1.141 | 2.295 |
| 24.7 | 1.424 | 1.080 | 1.879 | 50.3 | 1.619 | 1.140 | 2.298 |
| 24.8 | 1.426 | 1.081 | 1.881 | 50.4 | 1.620 | 1.140 | 2.302 |
| 24.9 | 1.427 | 1.082 | 1.883 | 50.5 | 1.620 | 1.139 | 2.305 |
| 25.0 | 1.429 | 1.083 | 1.885 | 50.6 | 1.621 | 1.138 | 2.309 |
| 25.1 | 1.430 | 1.084 | 1.887 | 50.7 | 1.622 | 1.137 | 2.312 |
| 25.2 | 1.431 | 1.085 | 1.889 | 50.8 | 1.622 | 1.137 | 2.316 |
| 25.3 | 1.433 | 1.086 | 1.891 | 50.9 | 1.623 | 1.136 | 2.319 |
| 25.4 | 1.434 | 1.087 | 1.893 | 51.0 | 1.624 | 1.135 | 2.323 |
| 25.5 | 1.435 | 1.088 | 1.894 | 51.1 | 1.625 | 1.135 | 2.326 |
| 25.6 | 1.437 | 1.089 | 1.896 | 51.2 | 1.625 | 1.134 | 2.330 |
| 25.7 | 1.438 | 1.090 | 1.898 | 51.3 | 1.626 | 1.133 | 2.333 |
| 25.8 | 1.439 | 1.091 | 1.899 | 51.4 | 1.627 | 1.132 | 2.337 |
| 25.9 | 1.441 | 1.092 | 1.901 | 51.5 | 1.627 | 1.132 | 2.341 |
| 26.0 | 1.442 | 1.093 | 1.902 | 51.6 | 1.628 | 1.131 | 2.344 |
| 26.1 | 1.443 | 1.094 | 1.904 | 51.7 | 1.629 | 1.130 | 2.348 |
| 26.2 | 1.444 | 1.095 | 1.905 | 51.8 | 1.630 | 1.129 | 2.351 |
| 26.3 | 1.445 | 1.096 | 1.906 | 51.9 | 1.630 | 1.129 | 2.355 |
| 26.4 | 1.447 | 1.097 | 1.908 | 52.0 | 1.631 | 1.128 | 2.359 |
| 26.5 | 1.448 | 1.098 | 1.909 | 52.1 | 1.632 | 1.127 | 2.362 |
| 26.6 | 1.449 | 1.099 | 1.910 | 52.2 | 1.632 | 1.126 | 2.366 |
| 26.7 | 1.450 | 1.100 | 1.911 | 52.3 | 1.633 | 1.125 | 2.370 |
| 26.8 | 1.451 | 1.101 | 1.912 | 52.4 | 1.634 | 1.125 | 2.374 |
| 26.9 | 1.452 | 1.102 | 1.914 | 52.5 | 1.635 | 1.124 | 2.377 |
| 27.0 | 1.453 | 1.103 | 1.915 | 52.6 | 1.635 | 1.123 | 2.381 |
| 27.1 | 1.454 | 1.104 | 1.916 | 52.7 | 1.636 | 1.122 | 2.385 |
| 27.2 | 1.455 | 1.105 | 1.917 | 52.8 | 1.637 | 1.122 | 2.388 |
| 27.3 | 1.457 | 1.106 | 1.918 | 52.9 | 1.637 | 1.121 | 2.392 |
| 27.4 | 1.458 | 1.107 | 1.918 | 53.0 | 1.638 | 1.120 | 2.396 |
| 27.5 | 1.459 | 1.108 | 1.919 | 53.1 | 1.639 | 1.119 | 2.400 |
| 27.6 | 1.460 | 1.109 | 1.920 | 53.2 | 1.640 | 1.118 | 2.404 |
| 27.7 | 1.461 | 1.111 | 1.921 | 53.3 | 1.640 | 1.118 | 2.407 |
| 27.8 | 1.462 | 1.112 | 1.922 | 53.4 | 1.641 | 1.117 | 2.411 |
| 27.9 | 1.463 | 1.113 | 1.923 | 53.5 | 1.642 | 1.116 | 2.415 |
| 28.0 | 1.463 | 1.114 | 1.923 | 53.6 | 1.642 | 1.115 | 2.419 |
| 28.1 | 1.464 | 1.115 | 1.924 | 53.7 | 1.643 | 1.114 | 2.423 |
| 28.2 | 1.465 | 1.116 | 1.925 | 53.8 | 1.644 | 1.113 | 2.427 |

---

|      |       |       |       |      |       |       |       |
|------|-------|-------|-------|------|-------|-------|-------|
| 28.3 | 1.466 | 1.117 | 1.925 | 53.9 | 1.645 | 1.113 | 2.431 |
| 28.4 | 1.467 | 1.118 | 1.926 | 54.0 | 1.645 | 1.112 | 2.435 |
| 28.5 | 1.468 | 1.119 | 1.926 | 54.1 | 1.646 | 1.111 | 2.439 |
| 28.6 | 1.469 | 1.120 | 1.927 | 54.2 | 1.647 | 1.110 | 2.442 |
| 28.7 | 1.470 | 1.121 | 1.928 | 54.3 | 1.647 | 1.109 | 2.446 |
| 28.8 | 1.471 | 1.122 | 1.928 | 54.4 | 1.648 | 1.109 | 2.450 |
| 28.9 | 1.472 | 1.123 | 1.929 | 54.5 | 1.649 | 1.108 | 2.454 |
| 29.0 | 1.472 | 1.124 | 1.929 | 54.6 | 1.650 | 1.107 | 2.458 |
| 29.1 | 1.473 | 1.125 | 1.929 | 54.7 | 1.650 | 1.106 | 2.462 |
| 29.2 | 1.474 | 1.126 | 1.930 | 54.8 | 1.651 | 1.105 | 2.466 |
| 29.3 | 1.475 | 1.127 | 1.930 | 54.9 | 1.652 | 1.104 | 2.470 |
| 29.4 | 1.476 | 1.128 | 1.931 | 55.0 | 1.652 | 1.104 | 2.474 |
| 29.5 | 1.477 | 1.129 | 1.931 | 55.1 | 1.653 | 1.103 | 2.478 |
| 29.6 | 1.477 | 1.130 | 1.932 | 55.2 | 1.654 | 1.102 | 2.483 |
| 29.7 | 1.478 | 1.131 | 1.932 | 55.3 | 1.655 | 1.101 | 2.487 |
| 29.8 | 1.479 | 1.132 | 1.932 | 55.4 | 1.655 | 1.100 | 2.491 |
| 29.9 | 1.480 | 1.133 | 1.933 | 55.5 | 1.656 | 1.099 | 2.495 |
| 30.0 | 1.481 | 1.134 | 1.933 | 55.6 | 1.657 | 1.098 | 2.499 |
| 30.1 | 1.481 | 1.135 | 1.933 | 55.7 | 1.658 | 1.098 | 2.503 |
| 30.2 | 1.482 | 1.136 | 1.934 | 55.8 | 1.658 | 1.097 | 2.507 |
| 30.3 | 1.483 | 1.137 | 1.934 | 55.9 | 1.659 | 1.096 | 2.511 |
| 30.4 | 1.484 | 1.138 | 1.934 | 56.0 | 1.660 | 1.095 | 2.516 |
| 30.5 | 1.484 | 1.139 | 1.935 | 56.1 | 1.660 | 1.094 | 2.520 |
| 30.6 | 1.485 | 1.140 | 1.935 | 56.2 | 1.661 | 1.093 | 2.524 |
| 30.7 | 1.486 | 1.141 | 1.935 | 56.3 | 1.662 | 1.092 | 2.528 |
| 30.8 | 1.486 | 1.141 | 1.936 | 56.4 | 1.663 | 1.092 | 2.532 |
| 30.9 | 1.487 | 1.142 | 1.936 | 56.5 | 1.663 | 1.091 | 2.537 |
| 31.0 | 1.488 | 1.143 | 1.936 | 56.6 | 1.664 | 1.090 | 2.541 |
| 31.1 | 1.489 | 1.144 | 1.937 | 56.7 | 1.665 | 1.089 | 2.545 |
| 31.2 | 1.489 | 1.145 | 1.937 | 56.8 | 1.665 | 1.088 | 2.549 |
| 31.3 | 1.490 | 1.146 | 1.937 | 56.9 | 1.666 | 1.087 | 2.554 |
| 31.4 | 1.491 | 1.147 | 1.937 | 57.0 | 1.667 | 1.086 | 2.558 |
| 31.5 | 1.491 | 1.148 | 1.938 | 57.1 | 1.668 | 1.085 | 2.562 |
| 31.6 | 1.492 | 1.149 | 1.938 | 57.2 | 1.668 | 1.085 | 2.566 |
| 31.7 | 1.493 | 1.149 | 1.938 | 57.3 | 1.669 | 1.084 | 2.571 |
| 31.8 | 1.493 | 1.150 | 1.939 | 57.4 | 1.670 | 1.083 | 2.575 |
| 31.9 | 1.494 | 1.151 | 1.939 | 57.5 | 1.671 | 1.082 | 2.580 |
| 32.0 | 1.495 | 1.152 | 1.939 | 57.6 | 1.671 | 1.081 | 2.584 |
| 32.1 | 1.495 | 1.153 | 1.940 | 57.7 | 1.672 | 1.080 | 2.588 |
| 32.2 | 1.496 | 1.153 | 1.940 | 57.8 | 1.673 | 1.079 | 2.593 |
| 32.3 | 1.497 | 1.154 | 1.941 | 57.9 | 1.674 | 1.078 | 2.597 |
| 32.4 | 1.497 | 1.155 | 1.941 | 58.0 | 1.674 | 1.078 | 2.601 |

---

Abbreviations: NO<sub>2</sub>, nitrogen dioxide; HR, hazard ratio; LCL, lower confidence limit; UCL, upper confidence limit.

**Table S3** Sensitive analyses of HR [95% CI] estimates for all-cause mortality associated with a-10 µg/m<sup>3</sup> increase in exposure to ambient NO<sub>2</sub>

| Analytic strategies                                             | Adjusted covariates                                                                                                                                                                                                                                       | HR<br>[95% CI]         | P for<br>association |
|-----------------------------------------------------------------|-----------------------------------------------------------------------------------------------------------------------------------------------------------------------------------------------------------------------------------------------------------|------------------------|----------------------|
| <b>Main analysis</b>                                            | Stratified by age and sex, adjusted for ethnicity, BMI, education, marital status, employment, physical activity, smoking, drinking, sleep duration, household air pollution, income, prevalence of chronic diseases, depressive symptoms, and urbanicity | 1.127<br>[1.042–1.219] | 0.003                |
| <b>Sensitivity analyses</b>                                     |                                                                                                                                                                                                                                                           |                        |                      |
| <i>Co-pollutant analysis + PM<sub>2.5</sub></i>                 | Covariates adjusted in main analysis plus ambient PM <sub>2.5</sub>                                                                                                                                                                                       | 1.158<br>[1.043–1.286] | 0.006                |
| <i>Co-pollutant analysis + O<sub>3</sub></i>                    | Covariates adjusted in main analysis plus ambient O <sub>3</sub>                                                                                                                                                                                          | 1.144<br>[1.052–1.244] | 0.002                |
| <i>Co-pollutant analysis + PM<sub>2.5</sub> + O<sub>3</sub></i> | Covariates adjusted in main analysis plus ambient PM <sub>2.5</sub> and O <sub>3</sub>                                                                                                                                                                    | 1.169<br>[1.051–1.301] | 0.004                |
| <i>Temperature-adjusted analysis</i>                            | Covariates adjusted in main analysis plus annual average temperature                                                                                                                                                                                      | 1.121<br>[1.025–1.225] | 0.012                |
| <i>DAG-based analysis*</i>                                      | Stratified by age and sex, adjusted for education, income, and urbanicity                                                                                                                                                                                 | 1.081<br>[1.007–1.159] | 0.030                |

Abbreviations: HR, hazard ratio; CI, confidence interval; BMI, body-mass index; NO<sub>2</sub>, nitrogen dioxide; PM<sub>2.5</sub>, particulate matter with aerodynamic diameter ≤2.5 µm; O<sub>3</sub>, ozone; DAG, directed acyclic graph. \*Covariates in DAG-based analysis were minimal sufficient adjustment sets, which was determined by combining the evaluation of DAG-dataset consistency with the identification of valid adjustment sets for statistically equivalent DAGs. Please also refer to the website of online DAGitty tool (<http://www.dagitty.net/learn/index.html>, accessed on November 30th, 2021) for details.

**Table S4** Provincial estimates of all-cause deaths and fractions attributable to ambient NO<sub>2</sub> in China for years 2010 and 2018, based on a counterfactual exposure of 6.9 µg/m<sup>3</sup>

| Region       | NO <sub>2</sub> -attributable deaths |        | Attributable fraction, % |      |
|--------------|--------------------------------------|--------|--------------------------|------|
|              | 2010                                 | 2018   | 2010                     | 2018 |
| Beijing      | 26501                                | 39988  | 29.8                     | 27.1 |
| Tianjin      | 21826                                | 22890  | 29.5                     | 26.2 |
| Hebei        | 126705                               | 113626 | 26.8                     | 23.3 |
| Shanxi       | 48172                                | 47015  | 24.4                     | 22.7 |
| Mongolia     | 21397                                | 19723  | 15.1                     | 12.5 |
| Liaoning     | 61925                                | 59098  | 22.1                     | 17.5 |
| Jilin        | 26970                                | 16997  | 16.3                     | 9.7  |
| Heilongjiang | 30911                                | 26436  | 15.7                     | 9.9  |
| Shanghai     | 37014                                | 47064  | 30.9                     | 28.8 |
| Jiangsu      | 148955                               | 144731 | 26.8                     | 24.7 |
| Zhejiang     | 75625                                | 70061  | 24.5                     | 20.1 |
| Anhui        | 81863                                | 74352  | 22.5                     | 20.8 |
| Fujian       | 32388                                | 34943  | 16.7                     | 14.1 |
| Jiangxi      | 40446                                | 36837  | 14.6                     | 12.5 |
| Shandong     | 155423                               | 148002 | 25.2                     | 20.3 |
| Henan        | 146965                               | 133350 | 23.1                     | 20.1 |
| Hubei        | 79768                                | 79874  | 22.5                     | 20.3 |
| Hunan        | 82632                                | 67835  | 18.3                     | 14.1 |
| Guangdong    | 81282                                | 93624  | 18.1                     | 16.9 |
| Guangxi      | 29770                                | 29538  | 11.5                     | 10.3 |
| Hainan       | 2508                                 | 2969   | 5.0                      | 5.1  |
| Chongqing    | 45069                                | 46213  | 23.8                     | 22.1 |
| Sichuan      | 125423                               | 119651 | 22.9                     | 21.2 |
| Guizhou      | 37373                                | 27943  | 16.0                     | 11.7 |
| Yunnan       | 32579                                | 31448  | 10.5                     | 10.1 |
| Tibet        | 1627                                 | 570    | 9.5                      | 3.7  |
| Shaanxi      | 55377                                | 55420  | 24.1                     | 22.7 |
| Gansu        | 28917                                | 26787  | 18.3                     | 15.4 |
| Qinghai      | 6553                                 | 5867   | 18.0                     | 14.5 |
| Ningxia      | 5342                                 | 5806   | 16.2                     | 14.5 |
| Xinjiang     | 27575                                | 22325  | 22.7                     | 19.4 |



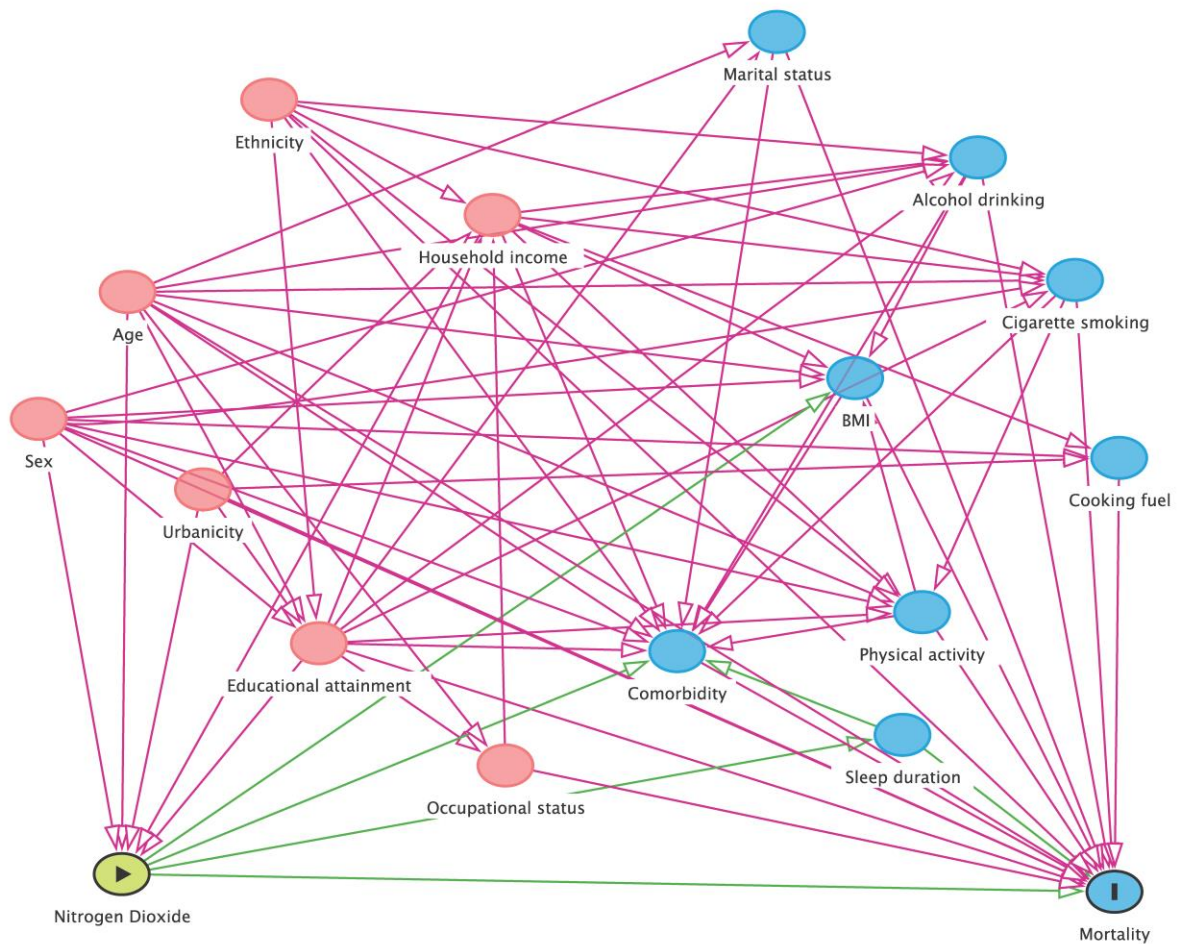

**Fig. S1** Directed acyclic graph for the longitudinal association between ambient NO<sub>2</sub> exposure and adult mortality, created using the online DAGitty tool ([www.dagitty.net](http://www.dagitty.net), accessed on November 30th, 2021). The minimally sufficient adjustment set identified by DAG method included sex, age, education, urbanicity, and household income. BMI, body-mass index; NO<sub>2</sub>, nitrogen dioxide; DAG, directed acyclic graph.

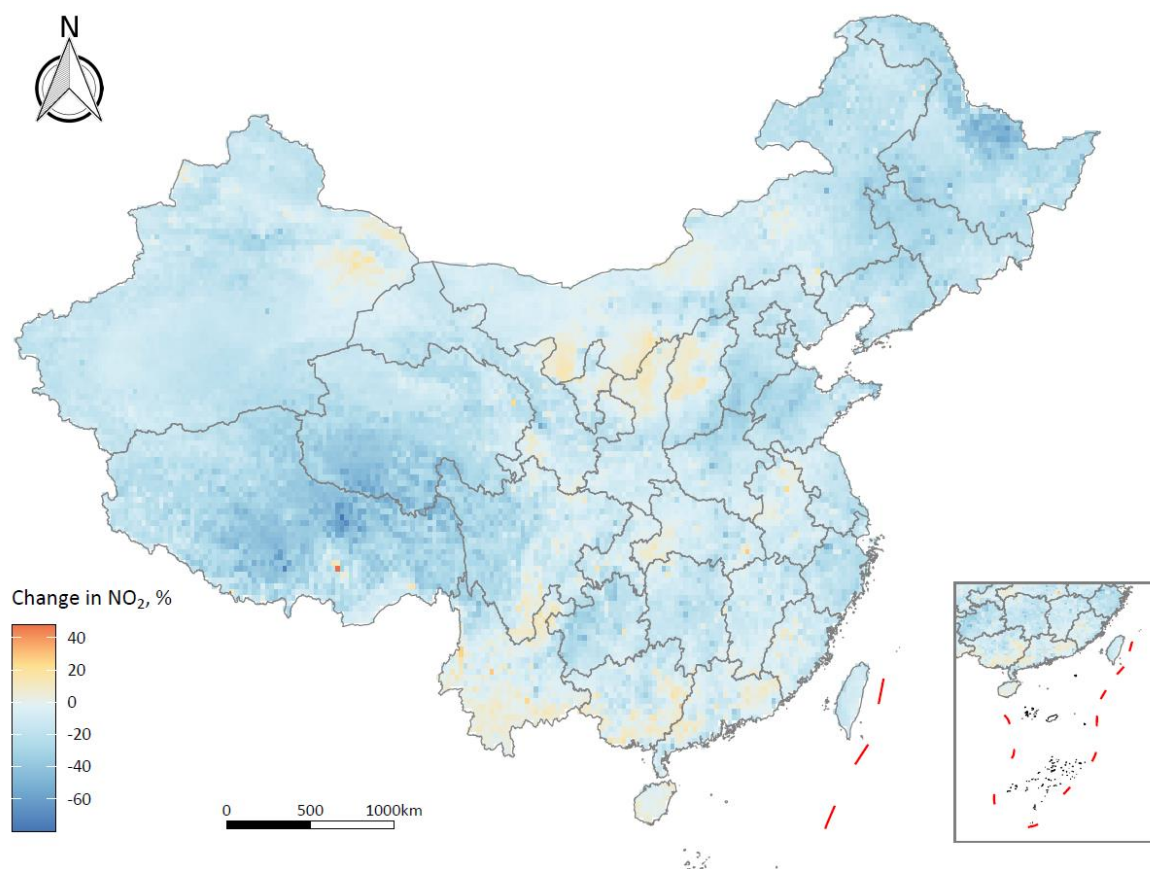

**Fig. S2** Percentage change (%) of average NO<sub>2</sub> concentration between 2010 and 2018. Islands in the South China Sea are shown in the box. NO<sub>2</sub>, nitrogen dioxide.

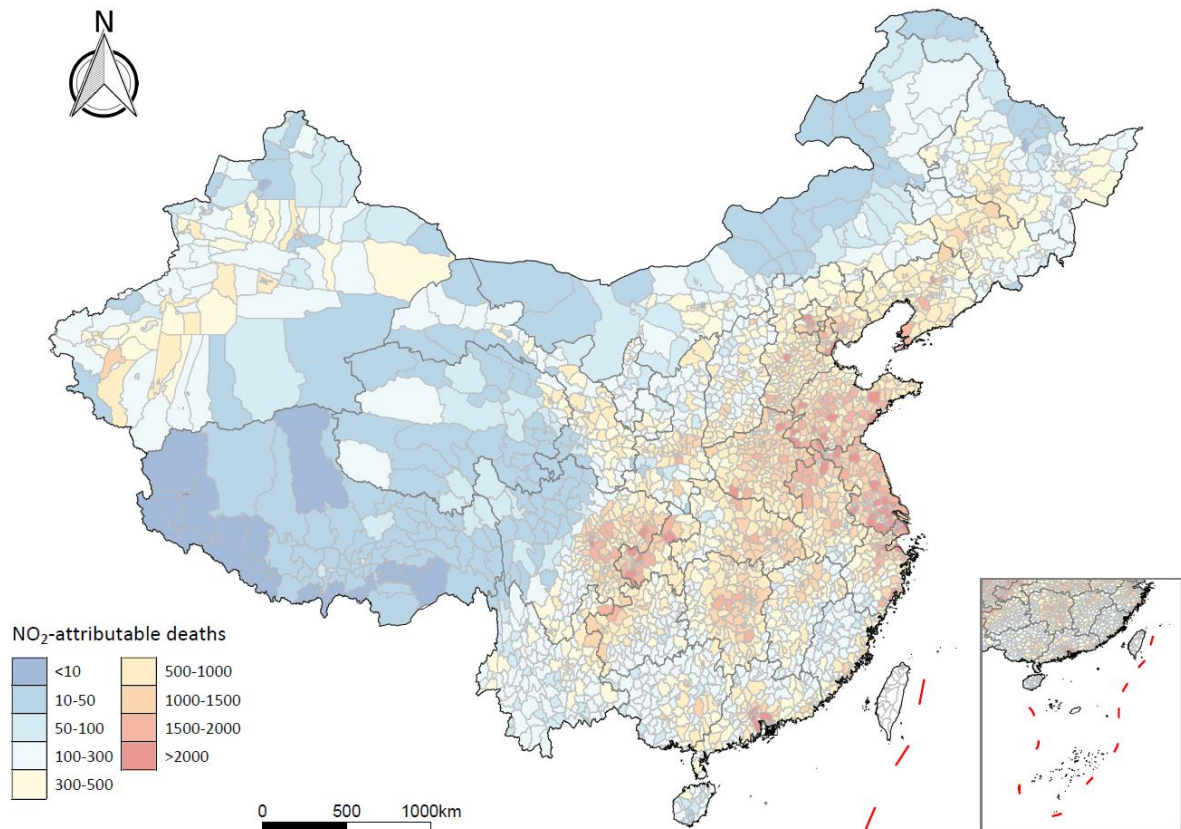

**Fig. S3** County-specific estimates of all-cause deaths attributable to ambient NO<sub>2</sub> across China in 2010. Taiwan Province is not included for assessment and islands in the South China Sea are shown in the box. NO<sub>2</sub>, nitrogen dioxide.

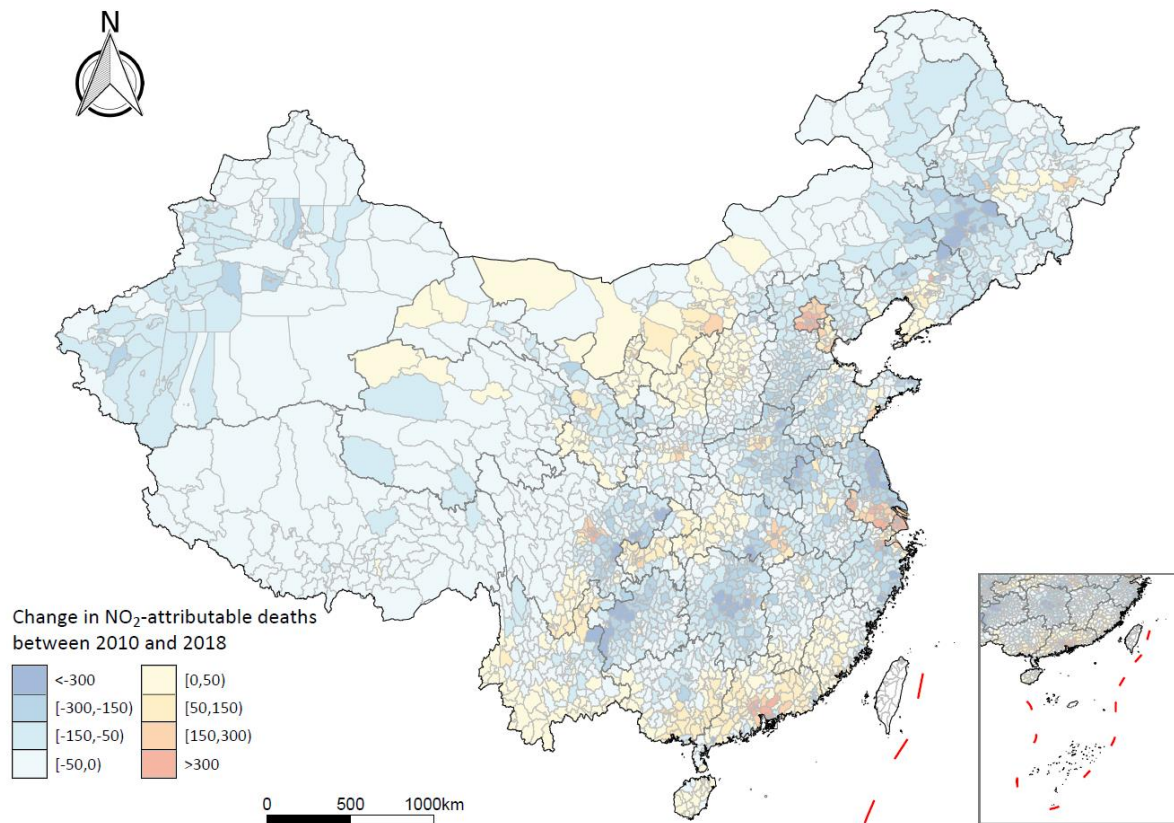

**Fig. S4** Regional changes in estimates of NO<sub>2</sub>-attributable deaths in China between 2010 and 2018. Taiwan Province is not included for assessment and islands in the South China Sea are shown in the box. NO<sub>2</sub>, nitrogen dioxide.
